# Supplementary material for: Future drought over Urmia Lake Basin under SSP scenarios: the relevance of snow melt
Source: Copernicus journal article supplement (doi:10.5194/hess-2024-48), 2024-02-26
Supplement: Supplementary file 1 [file hess-2024-48-supplement.pdf]

## Supplementary materials

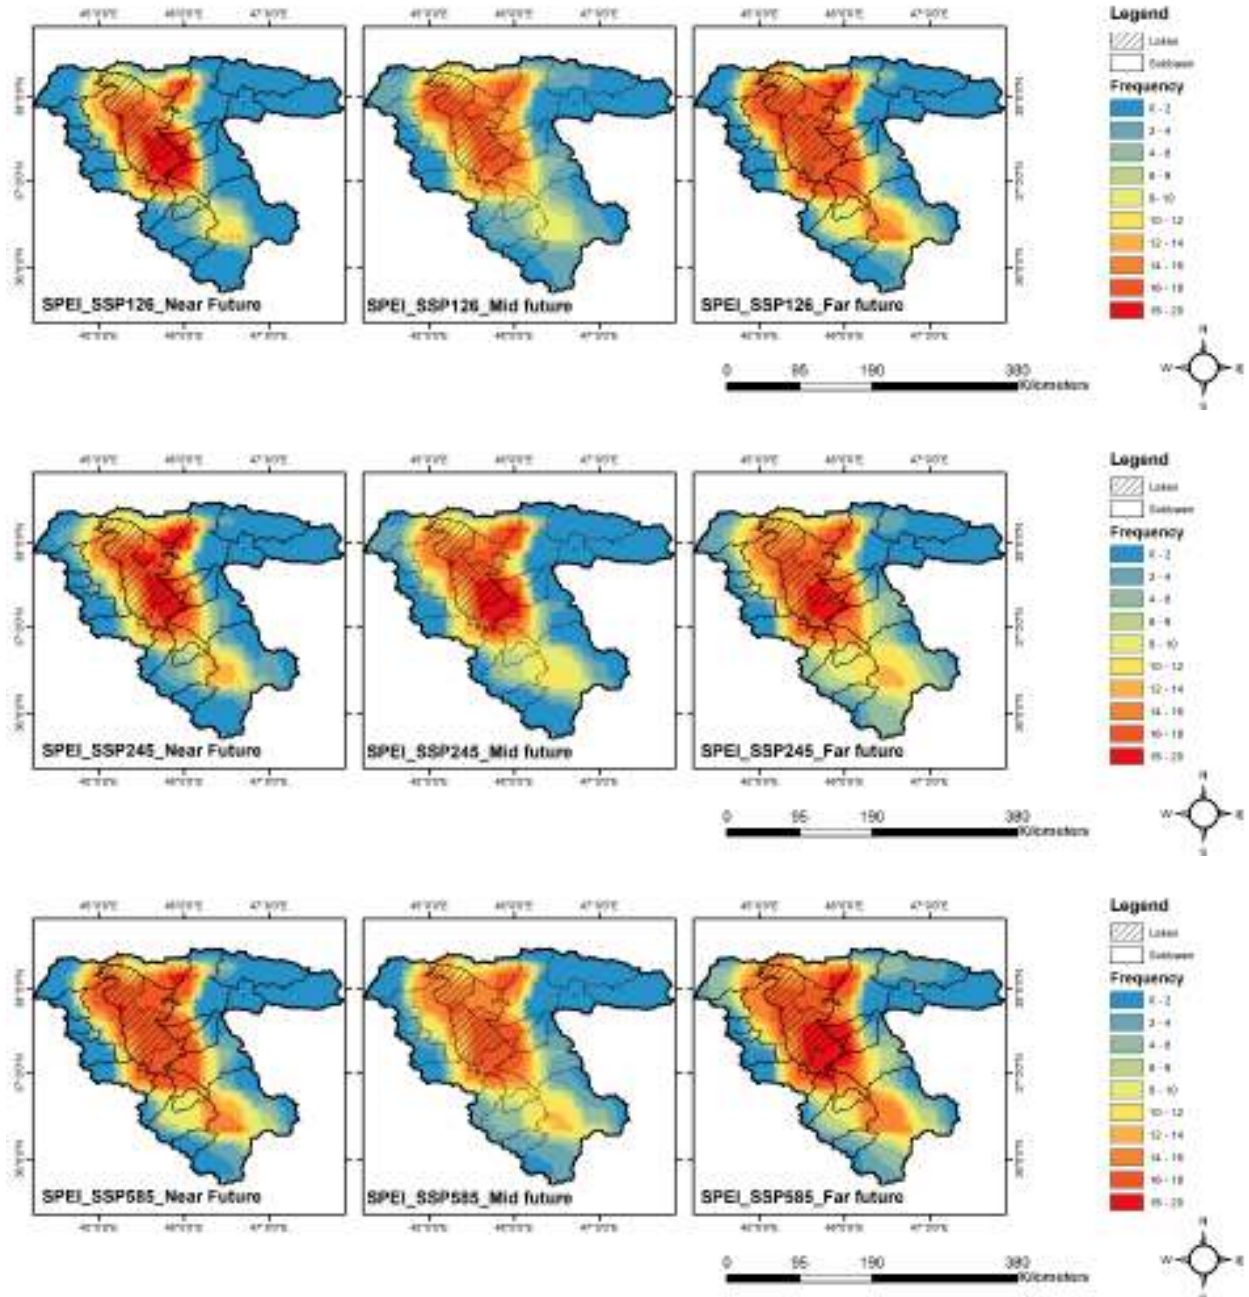

Figure S1. Maps showing SPEI drought frequency over ULB in the near (2021-2040), mid (2041-2060), and far (2081-2100) future under SSP1-2.6, SSP2-4.5, and SSP5-8.5

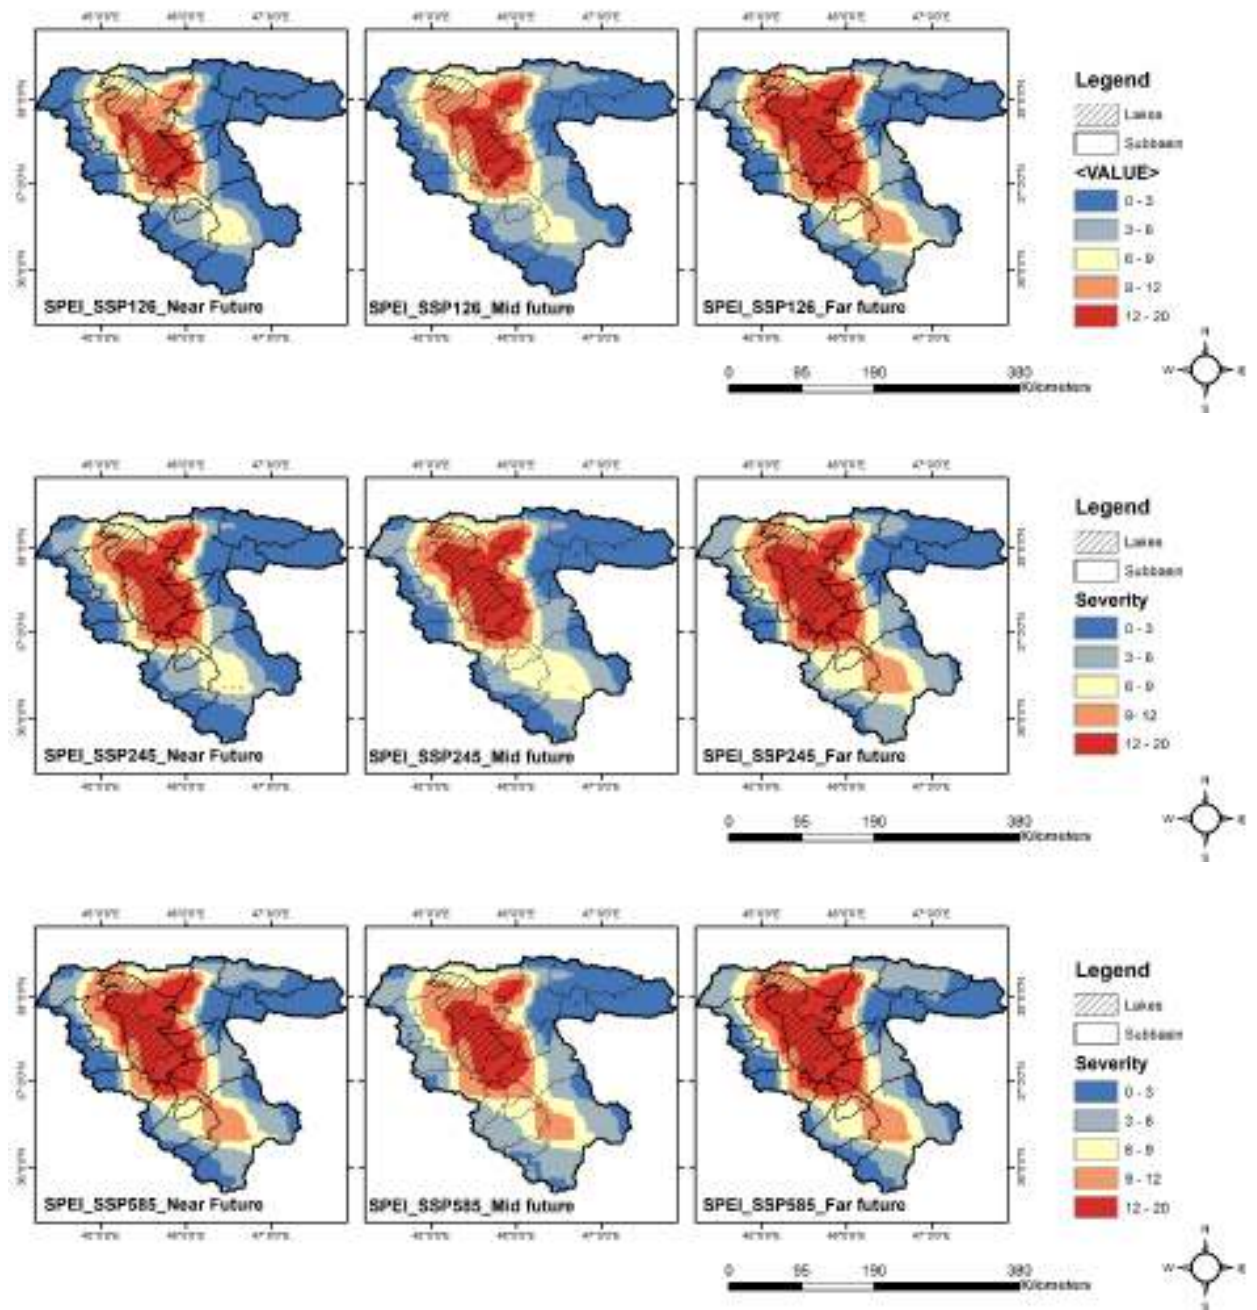

Figure S2. Maps showing SPEI drought severity over ULB in the near (2021-2040), mid (2041-2060), and far (2081-2100) future under SSP1-2.6, SSP2-4.5, and SSP5-8.5

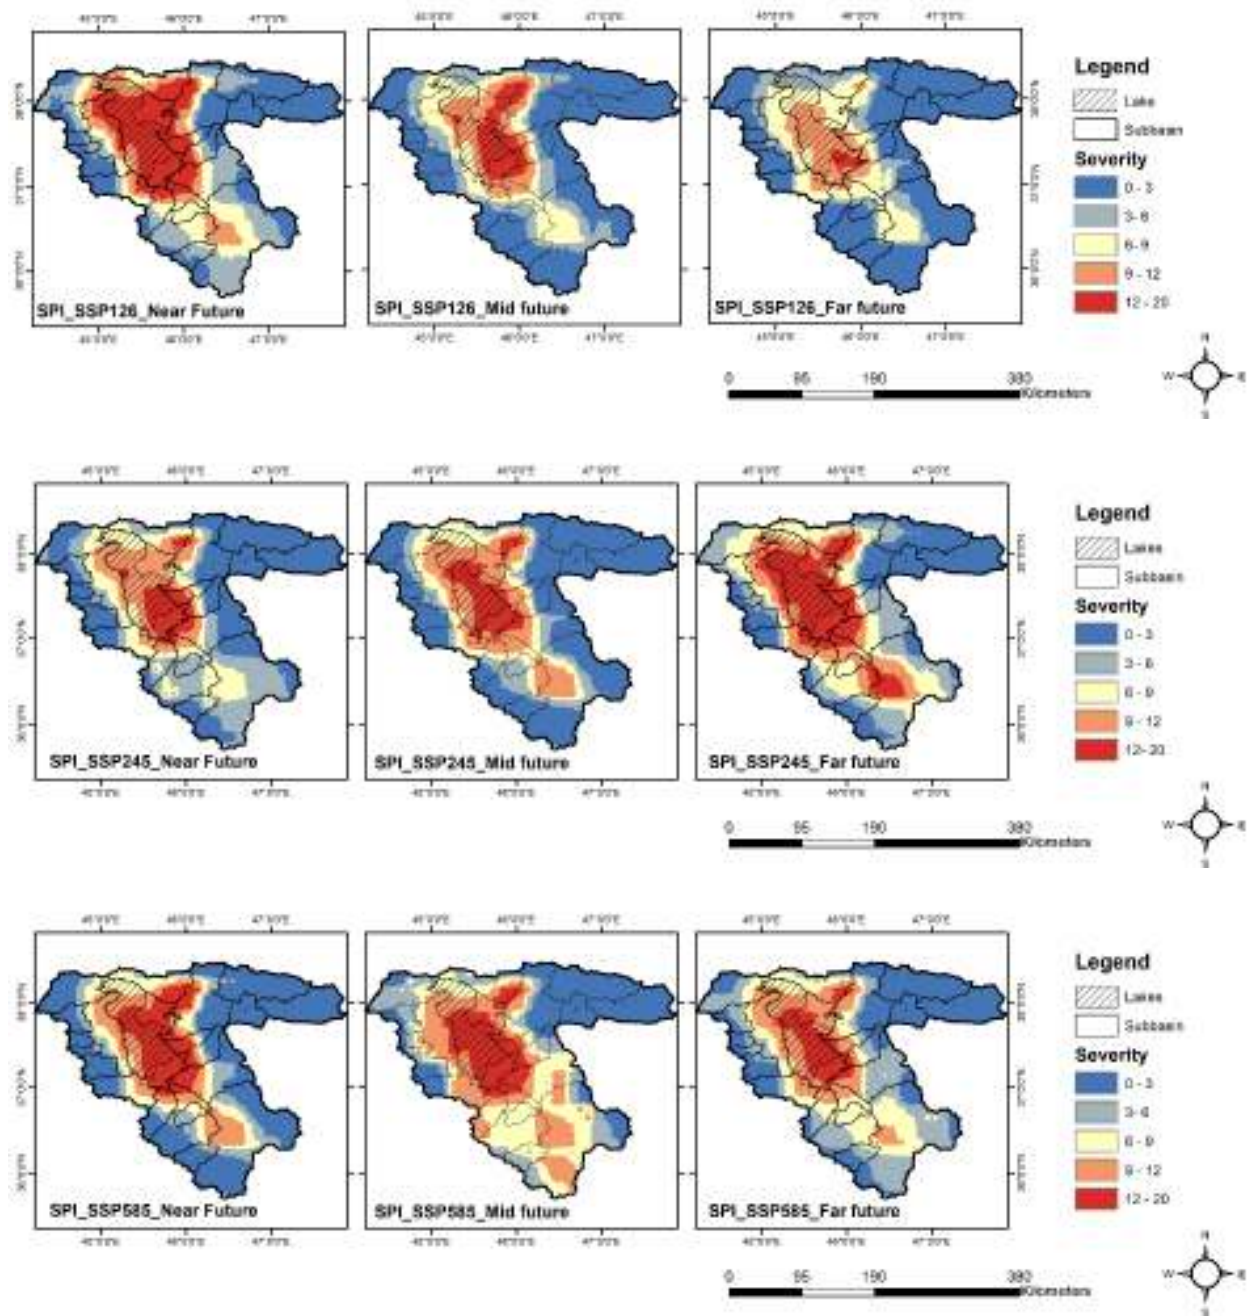

Figure S3. Maps showing SPI drought severity over ULB in the near (2021-2040), mid (2041-2060), and far (2081-2100) future under SSP1-2.6, SSP2-4.5, and SSP5-8.5

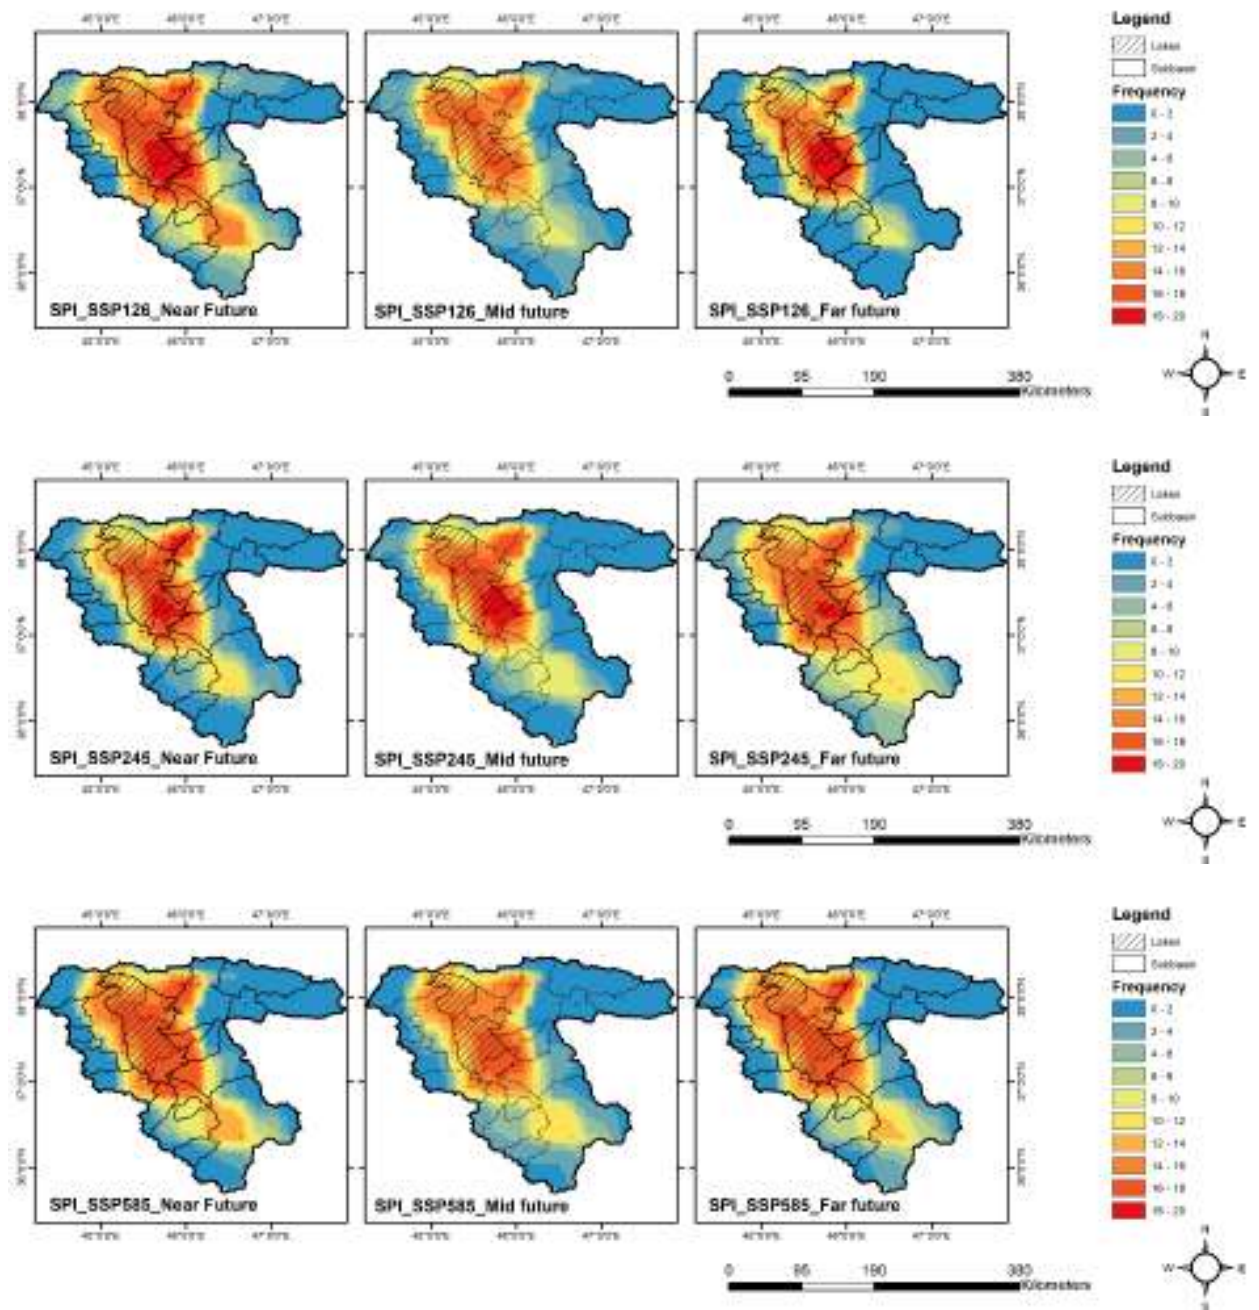

Figure S4. Maps showing SPI drought frequency over ULB in the near (2021-2040), mid (2041-2060), and far (2081-2100) future under SSP1-2.6, SSP2-4.5, and SSP5-8.5
